# Supplementary material
Source: Research Square preprint supplement (doi:10.21203/rs.3.rs-10315198/v1)
Supplement: Supplementary file 1 [file 42dcc0f18d1d37b73909cc42.xlsx]

## Sheet: conventional quality metrics
Cell index	Q_cycle_charge, charge capacity of the first cycle (Ah)	Q_cycle_discharge, discharge capacity of the first cycle(Ah)	CE, Coulombic Efficiency of the first cycle (%)	V_3stage_CC_charge, end voltage after 3-stage CC charge (V)	V_50h_rest, end voltage after 50 h rest (V)	Rest duration (h), not used as a candidate electrical feature	K-value, voltage drop rate scaled by 100 (%)	V_final, final voltage after recharging to the shipping SOC (V)	Q_cc_discharge, CC discharge capacity during formation (Ah)
F001	1.973	1.971	99.8986	3.9019	3.8687	50.6231	7.70775	3.5866	1.9719
F002	1.9789	1.9745	99.7777	3.9022	3.8699	50.5694	7.71652	3.5853	1.9754
F003	1.967	1.962	99.7458	3.9019	3.8684	50.6278	7.70703	3.5925	1.9639
F004	1.969	1.9633	99.7105	3.9019	3.8684	50.5744	7.71516	3.59	1.9648
F005	1.9712	1.9696	99.9188	3.9028	3.8684	50.5319	7.72343	3.5909	1.9712
F006	1.9685	1.9594	99.5377	3.9025	3.8678	50.6025	7.71207	3.5918	1.9613
F007	1.9754	1.9691	99.6811	3.9025	3.8668	50.6444	7.70568	3.5887	1.9713
F008	1.9715	1.9684	99.8428	3.9025	3.8631	50.5956	7.71313	3.5881	1.9707
F009	1.9746	1.9698	99.7569	3.9025	3.864	50.6253	7.7086	3.5887	1.9722
F010	1.9731	1.9664	99.6604	3.9019	3.8634	50.5953	7.71198	3.5884	1.9684
F011	1.9647	1.9634	99.9338	3.9031	3.8653	50.6372	7.70797	3.5977	1.9658
F012	1.9682	1.9615	99.6596	3.9019	3.8681	50.5681	7.71614	3.5949	1.9637
F013	1.9658	1.9601	99.71	3.9022	3.8678	50.5625	7.71758	3.5946	1.9626
F014	1.9678	1.963	99.7561	3.9015	3.8684	50.6372	7.70481	3.5949	1.9655
F015	1.9729	1.9693	99.8175	3.9015	3.8668	50.5897	7.71204	3.5918	1.9719
F016	1.9696	1.9622	99.6243	3.9025	3.8678	50.5917	7.71372	3.5934	1.9649
F017	1.9741	1.9693	99.7569	3.9025	3.8674	50.5031	7.72726	3.5915	1.9714
F018	1.9729	1.9659	99.6452	3.9022	3.8653	50.5536	7.71893	3.5921	1.9682
F019	1.9665	1.9625	99.7966	3.9022	3.8671	50.5842	7.71427	3.5987	1.9652
F020	1.9641	1.959	99.7403	3.9028	3.8678	50.5753	7.71681	3.5977	1.9615
F021	1.9552	1.9486	99.6624	3.9015	3.8678	50.625	7.70667	3.6005	1.951
F022	1.9664	1.9586	99.6033	3.9019	3.8668	50.5803	7.71427	3.5984	1.9612
F023	1.9679	1.9594	99.5681	3.9025	3.8662	50.5706	7.71694	3.5965	1.9629
F024	1.9653	1.9594	99.6998	3.9031	3.8634	50.3769	7.74779	3.5996	1.9631
F025	1.9665	1.9597	99.6542	3.9025	3.8628	50.4092	7.74165	3.5977	1.9631
F026	1.9667	1.9581	99.5627	3.9022	3.8498	50.42	7.73939	3.5971	1.9615
F027	1.9548	1.9522	99.867	3.9019	3.855	50.4808	7.72947	3.6055	1.9542
F028	1.9627	1.9565	99.6841	3.9019	3.86	50.4586	7.73287	3.6024	1.9595
F029	1.9598	1.9553	99.7704	3.9025	3.8609	50.5042	7.72709	3.6021	1.9587
F030	1.9598	1.9551	99.7602	3.9022	3.855	50.4553	7.73398	3.6052	1.9582
G001	1.9661	1.9484	99.0997	3.8988	3.8141	48.9594	7.96333	3.6027	1.9503
G002	1.9609	1.9516	99.5257	3.9	3.8048	48.7031	8.00771	3.6049	1.9532
G003	1.9755	1.9439	98.4004	3.8888	3.7462	50.1356	7.75657	3.6018	1.9486
G004	1.9838	1.9338	97.4796	3.9	3.6359	48.6683	8.01342	3.6008	1.9361
G005	1.988	1.9767	99.4316	3.9031	3.8411	49.5722	7.87356	3.5763	1.9754
H001	1.9871	1.9837	99.8289	3.9019	3.8523	50.4972	7.72696	3.5742	1.984
H002	1.9807	1.9783	99.8788	3.9015	3.8523	50.5453	7.71882	3.576	1.9782
H003	1.9428	1.9024	97.9205	3.9019	3.8516	50.4806	7.72951	3.6126	1.9721
H004	1.9851	1.9828	99.8841	3.9025	3.8628	50.5153	7.72539	3.5748	1.9826
H005	1.9791	1.977	99.8939	3.9022	3.8634	50.4514	7.73457	3.5766	1.976
I001	1.984	1.9824	99.9194	3.9019	3.8687	50.4828	7.72917	3.5763	1.9812
I002	1.9875	1.9857	99.9094	3.9022	3.869	50.4069	7.74139	3.5742	1.9846
I003	1.9813	1.9784	99.8536	3.9019	3.869	50.4836	7.72904	3.5797	1.9779
I004	1.985	1.9817	99.8338	3.9019	3.8684	50.4525	7.73381	3.5779	1.9815
I005	1.9866	1.9833	99.8339	3.9019	3.8659	50.4408	7.7356	3.581	1.9831
J001	1.9837	1.9802	99.8236	3.9025	3.8647	50.1619	7.7798	3.5776	1.9803
J002	1.9792	1.9767	99.8737	3.9022	3.8687	50.4769	7.73066	3.5804	1.9763
J003	1.9815	1.9786	99.8536	3.9025	3.8681	50.4556	7.73453	3.5791	1.9781
J004	1.976	1.9731	99.8532	3.9019	3.8687	50.5197	7.72352	3.5804	1.9729
J005	1.9906	1.9871	99.8242	3.9019	3.869	50.4464	7.73475	3.577	1.9874
K001	1.9348	1.9333	99.9225	3.886	3.8662	50.7706	7.65404	3.5915	1.9329
K002	1.9413	1.9396	99.9124	3.9019	3.8668	50.7389	7.69016	3.5906	1.9387
K003	1.9419	1.9399	99.897	3.9022	3.8662	50.71	7.69513	3.5894	1.9397
K004	1.9404	1.9373	99.8402	3.9015	3.8674	50.73	7.69072	3.5909	1.9368
K005	1.9443	1.9424	99.9023	3.9019	3.8671	50.7372	7.69041	3.59	1.9424
True positives (defective)	21	23	6	5	5	-	11	16	21
False positives (normal)	0	0	0	0	0	-	0	0	0

## Sheet: three-stage CC charge features
Cell index	t_40_cc1, duration of stage-1 CC charge (s)	t_100_cc2, duration of stage-2 CC charge (s)	t_160_cc3, duration of stage-3 CC charge (s)	Q_40_cc1, charged capacity during stage-1 CC charge (Ah)	Q_100_cc2, charged capacity during stage-2 CC charge (Ah)	Q_160_cc3, charged capacity during stage-3 CC charge (Ah)	E_40_cc1, charged energy during stage-1 CC charge (Wh)	E_100_cc2, charged energy during stage-2 CC charge (Wh)	E_160_cc3, charged energy during stage-3 CC charge (Wh)	dVrest_2p75_600s, voltage drop after 600 s rest following stage-1 charge to 2.75 V (V)	dVrest_3p0_600s, voltage drop after 600 s rest following stage-1 charge to 3.0 V (V)	dVrest_3p4_600s, voltage drop after 600 s rest following stage-2 charge to 3.4 V (V)	dVrest_3p65_600s, voltage drop after 600 s rest following stage-3 charge to 3.65 V (V)	dVrest_3p75_600s, voltage drop after 600 s rest following stage-3 charge to 3.75 V (V)	dVrest_3p92_600s, voltage drop after 600 s rest following stage-3 charge to 3.92 V (V)	V_at_0p02Ah, voltage at charged capacity of 0.02 Ah (V)	V_at_0p10Ah, voltage at charged capacity of 0.10 Ah (V)	V_at_0p40Ah, voltage at charged capacity of 0.40 Ah (V)	V_at_1p00Ah, voltage at charged capacity of 1.00 Ah (V)	V_at_1p20Ah, voltage at charged capacity of 1.20 Ah (V)	V_at_1p50Ah, voltage at charged capacity of 1.50 Ah (V)	Q_3stage_charge_Total, total charged capacity during three-stage CC charge (Ah)	E_3stage_charge_Total, total charged energy during three-stage CC charge (Wh)	dVrest_2p75_30s, voltage drop after 30 s rest following stage-1 charge to 2.75 V (mV)	dVrest_3p0_30s, voltage drop after 30 s rest following stage-1 charge to 3.0 V (mV)	dVrest_3p4_30s, voltage drop after 30 s rest following stage-2 charge to 3.4 V (mV)	dVrest_3p65_30s, voltage drop after 30 s rest following stage-3 charge to 3.65 V (mV)	dVrest_3p75_30s, voltage drop after 30 s rest following stage-3 charge to 3.75 V (mV)	dVrest_3p92_30s, voltage drop after 30 s rest following stage-3 charge to 3.92 V (mV)	dV_dt_2p75, average dV/dt in the first segment of stage-1 charge (μV/s)	dV_dt_3p0, average dV/dt in the second segment of stage-1 charge (μV/s)	dV_dt_3p4, average dV/dt during stage-2 charge (μV/s)	dV_dt_3p65, average dV/dt in the first segment of stage-3 charge (μV/s)	dV_dt_3p75, average dV/dt in the second segment of stage-3 charge (μV/s)	dV_dt_3p92, average dV/dt in the third segment of stage-3 charge (μV/s)
F001	14804	13827	24450	0.164473	0.384045	1.08869	0.459353	1.23835	3.98041	0.1135	0.0264	0.0223	0.0171	0.0146	0.0167	2.5982	2.907	3.2781	3.603	3.7007	3.8563	1.63721	5.67811	18.3	5	3.7	3.1	3.1	3.1	722.681	32.0342	30.826	21.8376	28.568	23.4429
F002	14889	13864	24520	0.16543	0.38513	1.09047	0.461211	1.24201	3.98728	0.1085	0.0261	0.0217	0.0171	0.0146	0.0167	2.57591	2.9058	3.2769	3.6021	3.6991	3.8547	1.64103	5.6905	17.7	4.7	3.4	3.1	3.4	3.1	698.271	31.714	30.7026	21.705	28.5366	23.3068
F003	14865	13785	24413	0.165192	0.382958	1.0878	0.460635	1.23487	3.97714	0.1113	0.0267	0.0226	0.0174	0.014	0.017	2.5787	2.9058	3.27786	3.6033	3.701	3.8563	1.63599	5.67277	18.3	5	3.7	3.4	2.8	3.1	701.968	31.8857	30.9417	21.8727	28.5436	23.4345
F004	15026	13805	24424	0.166958	0.383512	1.08628	0.465315	1.23664	3.97175	0.1094	0.0257	0.022	0.0171	0.0149	0.017	2.5716	2.9024	3.2759	3.60269	3.7007	3.85633	1.63675	5.67371	17.7	5	3.7	3.4	3.1	3.4	681.301	31.63	30.8099	21.8223	28.7708	23.4191
F005	15000	13851	24557	0.166623	0.384693	1.09089	0.464628	1.24048	3.98875	0.1088	0.0264	0.022	0.0168	0.0139	0.0161	2.5778	2.9036	3.2756	3.6015	3.6988	3.8544	1.6422	5.69385	18	5	3.7	3.1	2.8	3.1	695.007	31.4579	30.7509	21.6856	28.3807	23.269
F006	14911	13805	24438	0.165675	0.383485	1.08658	0.461851	1.23659	3.97303	0.1101	0.0264	0.0223	0.0174	0.0139	0.0164	2.57401	2.9051	3.27714	3.6033	3.70111	3.8572	1.63574	5.67147	17.7	5	3.4	3.4	3.1	3.1	696.961	31.8142	30.8316	21.8933	28.495	23.463
F007	14723	13776	24504	0.163571	0.382667	1.08749	0.455474	1.23409	3.97592	0.1091	0.0264	0.0223	0.0171	0.0139	0.0167	2.57101	2.9061	3.28072	3.6042	3.7016	3.8572	1.63373	5.66548	18	5.3	3.4	3.4	3.1	3.4	690.231	32.4366	30.877	21.7576	28.2095	23.3553
F008	14740	13782	24419	0.163778	0.382851	1.08644	0.456222	1.2346	3.97218	0.1079	0.0254	0.0223	0.0174	0.0142	0.0164	2.5771	2.9058	3.28019	3.6042	3.7019	3.8578	1.63309	5.66309	17.7	5	3.7	3.7	3.1	3.1	684.539	32.2272	30.8396	21.8881	28.3216	23.4643
F009	14607	13768	24463	0.162301	0.382483	1.08723	0.452712	1.23351	3.9749	0.1107	0.0257	0.0223	0.0174	0.0136	0.0164	2.5961	2.9079	3.2818	3.6049	3.7025	3.8585	1.63202	5.66112	18.3	5	3.7	3.4	2.8	3.1	705.151	32.5957	30.8709	21.8459	28.4779	23.4315
F010	14726	13782	24437	0.163613	0.382824	1.08618	0.455572	1.23467	3.97098	0.1091	0.0254	0.0214	0.0174	0.0143	0.0173	2.56946	2.9058	3.2806	3.6042	3.70185	3.8573	1.63262	5.66123	18	4.7	3.4	3.4	2.8	3.7	686.82	32.4117	30.8613	21.7744	28.4121	23.4912
F011	14534	13781	24476	0.161489	0.382779	1.08793	0.450691	1.23454	3.97761	0.1144	0.0261	0.0223	0.0171	0.0139	0.0161	2.6035	2.9092	3.2831	3.6052	3.7025	3.8588	1.63221	5.66291	18.9	5	3.4	3.1	3.1	3.7	728.621	32.8791	30.8636	21.8113	28.2095	23.4643
F012	14799	13758	24487	0.164433	0.382167	1.0881	0.458144	1.23246	3.97811	0.1091	0.0254	0.0223	0.0174	0.014	0.0173	2.5756	2.9048	3.28	3.6039	3.7013	3.8569	1.6347	5.66871	17.7	4.7	3.7	3.4	2.8	3.1	688.798	32.2089	30.8934	21.7921	28.6513	23.4161
F013	14817	13762	24485	0.164592	0.382256	1.0865	0.458128	1.23275	3.97238	0.1073	0.0254	0.022	0.0168	0.0142	0.0167	2.56614	2.9045	3.2796	3.6039	3.7019	3.8575	1.63338	5.66339	17.7	5	3.7	3.4	3.1	3.1	677.601	32.1297	30.8626	21.7698	28.3876	23.39
F014	14643	13748	24401	0.162722	0.381927	1.08634	0.454024	1.23163	3.97138	0.1135	0.0257	0.0226	0.0174	0.0143	0.0177	2.5967	2.9076	3.28125	3.6049	3.7025	3.8578	1.63102	5.65715	18.3	5	3.7	3.4	3.1	3.4	718.441	32.5642	30.9377	21.8481	28.5122	23.6088
F015	14825	13777	24361	0.164722	0.382719	1.08473	0.458943	1.23422	3.9656	0.1104	0.0254	0.0217	0.0168	0.0146	0.0177	2.575	2.9048	3.27915	3.6036	3.7016	3.8575	1.63225	5.65903	18	5	3.4	3.1	3.1	3.7	689.389	32.2029	30.8725	21.7678	28.5959	23.5783
F016	14757	13752	24447	0.163977	0.381987	1.08668	0.456336	1.23183	3.97326	0.1073	0.0257	0.022	0.0171	0.0139	0.0167	2.56289	2.9051	3.2806	3.6046	3.7025	3.8585	1.63268	5.66154	18	5	3.4	3.1	2.8	3.7	674.507	32.2721	30.9068	21.8135	28.5366	23.3959
F017	14889	13828	24561	0.165397	0.384121	1.09075	0.460344	1.23869	3.98827	0.1067	0.0254	0.022	0.0168	0.0146	0.0164	2.56213	2.9036	3.2775	3.6024	3.6997	3.85551	1.64027	5.68731	17.4	5	3.7	3.1	3.1	2.8	671.996	31.9473	30.737	21.752	28.4742	23.2309
F018	14742	13785	24569	0.163743	0.382892	1.08728	0.455871	1.23466	3.97521	0.1088	0.0261	0.0223	0.0171	0.0139	0.0167	2.56828	2.9061	3.2796	3.6039	3.7016	3.85734	1.63392	5.66573	18	5	3.4	3.4	3.1	3.1	686.544	32.3415	30.8764	21.7225	28.3709	23.3392
F019	14694	13790	24499	0.163256	0.383094	1.0888	0.454659	1.23547	3.98062	0.1082	0.0257	0.0223	0.0171	0.0139	0.017	2.57474	2.9064	3.2809	3.6036	3.7013	3.8566	1.63515	5.67075	18.3	5	3.4	3.1	3.1	3.4	691.278	32.419	30.8217	21.7694	28.3531	23.4429
F020	14770	13776	24470	0.1641	0.382654	1.08792	0.456992	1.23397	3.97784	0.1079	0.0254	0.0217	0.0168	0.0139	0.0164	2.57035	2.90536	3.27989	3.6039	3.7022	3.8581	1.63468	5.6688	17.7	5	3.7	3.4	3.1	3.4	687.17	32.2429	30.853	21.803	28.4359	23.3574
F021	14767	13717	24354	0.164068	0.381061	1.08242	0.456631	1.22871	3.95721	0.1067	0.0257	0.0226	0.0171	0.0149	0.0177	2.56605	2.9051	3.28057	3.6055	3.7038	3.8594	1.62755	5.64255	17.7	5	3.7	3.1	3.1	3.4	680.373	32.2304	30.9857	21.9251	28.6725	23.6157
F022	14729	13807	24463	0.163628	0.383507	1.08633	0.45567	1.23681	3.97165	0.1082	0.0254	0.0217	0.0171	0.0146	0.017	2.57231	2.9058	3.28	3.6039	3.70167	3.8572	1.63347	5.66413	18	5	3.4	3.1	3.1	3.1	687.011	32.3487	30.7837	21.7343	28.6376	23.4548
F023	14769	13788	24477	0.164065	0.382976	1.0853	0.456743	1.23502	3.96813	0.1079	0.0254	0.022	0.0168	0.0139	0.0167	2.56923	2.9051	3.2796	3.6042	3.70232	3.8588	1.63234	5.65989	17.7	5	3.4	3.1	3.1	3.4	684.316	32.233	30.8479	21.7785	28.3807	23.4018
F024	15415	13813	24504	0.171278	0.383735	1.0891	0.476313	1.23744	3.98286	0.0992	0.0245	0.0217	0.0171	0.0139	0.0155	2.5455	2.8958	3.2722	3.6005	3.6985	3.8544	1.64412	5.69661	16.4	4.4	3.7	3.7	3.1	2.8	635.496	30.4015	30.7074	21.8006	28.6903	23.1695
F025	15398	13755	24462	0.171089	0.382124	1.08805	0.474722	1.23232	3.97856	0.0977	0.0239	0.0217	0.0171	0.0146	0.0167	2.5179	2.8934	3.27409	3.6011	3.6994	3.855	1.64126	5.6856	16.4	4.4	3.4	3.4	3.1	3.7	607.754	30.8013	30.8078	21.8205	28.6065	23.3241
F026	15421	13722	24434	0.171399	0.381215	1.08648	0.475838	1.22931	3.97328	0.0992	0.0239	0.022	0.0168	0.0149	0.0167	2.5228	2.8934	3.27352	3.6021	3.7007	3.8563	1.63909	5.67842	16.4	4.4	3.7	3.1	3.4	2.8	616.977	30.7502	30.8797	21.9339	28.8741	23.2479
F027	15183	13771	24403	0.168742	0.382578	1.0854	0.468415	1.23371	3.96862	0.0983	0.0242	0.022	0.0171	0.0146	0.017	2.53177	2.8965	3.2756	3.6024	3.7003	3.8566	1.63672	5.67075	16.4	4.7	3.7	3.7	3.1	3.1	624.727	31.2225	30.748	21.8662	28.7224	23.4037
F028	15282	13725	24429	0.169798	0.381299	1.08584	0.47096	1.22963	3.97003	0.0983	0.0242	0.022	0.0168	0.0143	0.017	2.51421	2.8946	3.27584	3.6021	3.7003	3.856	1.63698	5.67075	16.7	4.7	3.7	3.1	3.1	3.1	615.501	31.1443	30.8511	21.8223	28.6239	23.4043
F029	15170	13682	24421	0.168556	0.380094	1.08627	0.467962	1.22587	3.97181	0.0989	0.0242	0.022	0.0171	0.0143	0.0167	2.5319	2.8968	3.2781	3.6033	3.7016	3.8572	1.63492	5.66564	16.4	5	3.7	3.7	3.1	3.1	627.261	31.2724	30.97	21.8815	28.7224	23.3274
F030	15230	13781	24438	0.169252	0.382844	1.08683	0.469725	1.23473	3.97391	0.0989	0.0242	0.0217	0.0171	0.0149	0.017	2.52812	2.8958	3.2756	3.6018	3.69952	3.8554	1.63893	5.67837	16.4	5	3.4	3.7	3.4	3.1	622.79	31.1773	30.7475	21.8692	28.6903	23.3801
G001	18231	14644	25958	0.202567	0.406737	1.15218	0.562973	1.31218	4.21475	0.1135	0.0267	0.0239	0.0183	0.0164	0.0201	2.4702	2.858	3.2285	3.5683	3.6452	3.8092	1.76152	6.09004	16.4	4.7	3.7	3.4	2.8	3.7	509.738	27.4229	29.1061	20.8995	27.8351	21.732
G002	19608	14452	25697	0.217921	0.401471	1.14461	0.609036	1.29473	4.18608	0.1135	0.0285	0.0235	0.0177	0.0158	0.0189	2.51938	2.85234	3.2136	3.5652	3.6349	3.8045	1.764	6.08985	16.7	4.7	3.4	3.1	3.1	3.4	512.556	24.6804	29.645	21.0098	27.4825	22.2143
G003	15972	13873	24753	0.177467	0.385393	1.09845	0.49137	1.24195	4.01995	0.1129	0.027	0.0232	0.0177	0.0155	0.0149	2.4643	2.8856	3.2595	3.6008	3.6917	3.8461	1.66134	5.7534	17.7	5	3.4	3.1	3.1	2.8	634.435	30.8872	30.2984	21.5274	26.7421	23.545
G004	18592	14974	26314	0.206578	0.415944	1.17086	0.575559	1.34183	4.28546	0.102	0.0273	0.0235	0.018	0.018	0.0192	2.4919	2.8555	3.2198	3.5642	3.648	3.7958	1.79338	6.20286	17.1	4.7	3.7	3.1	3.1	3.7	531.993	25.315	28.5314	20.9406	26.7133	21.3743
G005	16867	14319	25442	0.187369	0.39775	1.13015	0.519384	1.28306	4.13368	0.1144	0.0254	0.0232	0.018	0.0155	0.0161	2.46784	2.8695	3.24889	3.5819	3.6721	3.8253	1.71527	5.93612	16.8	4.7	3.7	3.4	2.8	3.1	525.221	30.1296	29.662	21.2945	27.714	22.3635
H001	15159	13709	24430	0.168433	0.380882	1.08581	0.468141	1.22838	3.96995	0.1005	0.0242	0.0217	0.0168	0.0146	0.017	2.5434	2.8971	3.2778	3.60299	3.7013	3.8572	1.63513	5.66647	16.7	4.7	3.4	3.1	3.4	3.1	631.066	31.382	30.8871	21.8446	28.6449	23.4333
H002	15188	13663	24274	0.168806	0.379547	1.08065	0.468781	1.22399	3.95106	0.0998	0.0242	0.022	0.0171	0.0146	0.0174	2.53326	2.8965	3.2778	3.6039	3.7031	3.86002	1.62901	5.64382	16.7	5	3.4	3.7	3.1	3.1	624.634	31.3335	31.013	21.9368	28.9213	23.5856
H003	15191	13746	24420	0.168851	0.381872	1.08705	0.468968	1.23142	3.97476	0.1014	0.0239	0.0217	0.0171	0.0149	0.017	2.53172	2.89672	3.27605	3.60226	3.7007	3.8563	1.63777	5.67515	16.8	4.4	3.4	3.4	3.4	2.8	630.237	31.402	30.8258	21.8451	28.7435	23.418
H004	15131	13688	24413	0.168124	0.38026	1.08418	0.467089	1.2263	3.96411	0.1001	0.0242	0.0223	0.0171	0.0139	0.0167	2.5427	2.8977	3.2781	3.6036	3.7022	3.8585	1.63257	5.6575	16.7	4.7	3.4	3.4	3.1	3.1	632.94	31.4099	30.9564	21.8798	28.6413	23.343
H005	15324	13757	24404	0.170224	0.382024	1.08436	0.472557	1.23193	3.96523	0.0989	0.0239	0.0217	0.0168	0.0146	0.0164	2.52458	2.8943	3.2747	3.60225	3.7013	3.8575	1.6366	5.66972	16.4	5	3.4	3.1	3.1	3.1	612.809	31.0348	30.7793	21.8516	28.9454	23.3472
I001	15174	13756	24442	0.168558	0.382035	1.0854	0.468027	1.23204	3.96836	0.0995	0.0242	0.022	0.0174	0.0146	0.017	2.53634	2.89688	3.2765	3.6024	3.7007	3.8563	1.63599	5.66843	16.7	5	3.4	3.7	2.8	3.4	622.272	31.3391	30.8033	21.8446	28.5679	23.3544
I002	15378	13797	24469	0.170824	0.383136	1.08791	0.474753	1.2355	3.97831	0.0992	0.0236	0.022	0.0171	0.0149	0.017	2.53634	2.8943	3.2731	3.6008	3.6991	3.855	1.64187	5.68856	16.4	4	3.1	3.4	3.4	3.4	619.96	30.8439	30.6683	21.8722	28.7648	23.2248
I003	15140	13776	24453	0.16818	0.382616	1.08774	0.467822	1.23395	3.977	0.1005	0.0239	0.0217	0.0171	0.0143	0.017	2.5579	2.898	3.2765	3.6018	3.7	3.8557	1.63854	5.67877	16.7	4.4	3.4	3.4	2.8	3.1	634.367	31.2656	30.7586	21.8477	28.666	23.4298
I004	15248	13769	24464	0.16938	0.382375	1.0862	0.47084	1.23316	3.97131	0.1008	0.0242	0.022	0.0168	0.0149	0.017	2.54254	2.8958	3.27546	3.6015	3.6997	3.85558	1.63796	5.67531	16.7	5	3.7	3.1	3.1	3.4	625.742	31.1738	30.7743	21.8013	28.6343	23.4893
I005	15344	13760	24420	0.170489	0.382184	1.08667	0.47353	1.23246	3.97329	0.0986	0.0239	0.0214	0.0168	0.0143	0.0173	2.5306	2.8943	3.2744	3.6011	3.6994	3.8563	1.63935	5.67928	16.4	4.7	3.4	3.1	2.8	3.4	617.988	30.931	30.7726	21.8394	28.8215	23.3978
J001	15591	14077	24859	0.17319	0.390906	1.10242	0.482546	1.26085	4.0314	0.1057	0.0245	0.0229	0.0171	0.0146	0.0164	2.5654	2.8927	3.2669	3.59426	3.6898	3.8451	1.66652	5.77479	17.1	5	4	3.4	3.1	2.8	639.29	30.5651	30.1293	21.5672	28.3229	22.8603
J002	15185	13749	24457	0.16868	0.381764	1.08586	0.468909	1.23115	3.97036	0.1014	0.0242	0.0217	0.0171	0.0146	0.0167	2.54594	2.8968	3.27684	3.6027	3.701	3.85692	1.6363	5.67042	16.7	4.7	3.1	3.4	3.4	3.1	634.355	31.3192	30.819	21.7866	28.6449	23.3186
J003	15279	13766	24423	0.169781	0.382357	1.08474	0.472661	1.23301	3.96657	0.1039	0.0242	0.0214	0.0168	0.0143	0.0164	2.56092	2.8952	3.2747	3.6024	3.70084	3.8572	1.63688	5.67223	17.4	5	3.4	3.4	2.8	3.1	635.366	31.141	30.81	21.8204	28.5574	23.2896
J004	15191	13691	24357	0.168787	0.380339	1.08224	0.469865	1.22646	3.95695	0.1045	0.0245	0.0223	0.0168	0.0146	0.017	2.56201	2.8971	3.2769	3.6036	3.70279	3.8588	1.63136	5.65328	17.4	4.7	3.4	3.1	3.1	3.1	640.031	31.3623	30.9788	21.9428	28.7718	23.472
J005	15159	13823	24521	0.168414	0.38404	1.08918	0.468281	1.23849	3.9825	0.1017	0.0248	0.0214	0.0171	0.0146	0.017	2.55028	2.8971	3.2753	3.6011	3.6988	3.8544	1.64163	5.68928	16.7	5	3.4	3.7	3.4	3.1	631.092	31.3901	30.654	21.7102	28.561	23.2541
K001	15391	13312	23632	0.171003	0.369779	1.0506	0.475831	1.19364	3.84408	0.1014	0.0242	0.022	0.0174	0.0149	0.0168	2.557	2.8946	3.2843	3.617	3.7193	3.8764	1.59138	5.51356	17.1	4.7	3.7	3.4	2.8	3.4	630.306	30.7989	31.365	22.2978	28.8883	24.2685
K002	14891	13528	24030	0.165441	0.375796	1.06935	0.460447	1.21191	3.90979	0.1045	0.0245	0.0226	0.0174	0.0149	0.0173	2.5694	2.9014	3.28362	3.6098	3.7109	3.8678	1.61058	5.58215	17.4	4.4	4	3.4	3.1	3.7	653.359	32.0663	31.3743	22.2431	29.0099	23.8439
K003	15082	13444	24027	0.167584	0.373407	1.0688	0.465549	1.20412	3.90817	0.1023	0.0245	0.0229	0.0174	0.0146	0.017	2.54299	2.8977	3.2831	3.6101	3.7115	3.8687	1.60983	5.57796	17.1	4.7	3.4	3.4	2.8	3.1	632.437	31.6941	31.548	22.2813	29.0868	23.8071
K004	14938	13474	24069	0.165941	0.374244	1.0677	0.461243	1.20693	3.90361	0.1039	0.0251	0.0223	0.0177	0.0149	0.0177	2.55283	2.90021	3.28455	3.6104	3.7121	3.86869	1.60788	5.57178	17.1	5	3.7	3.7	2.8	3.7	647.233	32.0333	31.5	22.1552	29.3082	23.8101
K005	14881	13526	24046	0.165387	0.375687	1.06985	0.459534	1.21161	3.9117	0.1032	0.0248	0.022	0.0171	0.0146	0.017	2.55066	2.9011	3.284	3.6095	3.71094	3.8674	1.61104	5.58326	17.1	5	3.4	3.1	3.1	3.4	644.701	32.1799	31.3789	22.146	29.0868	23.7593
True positives (defective)	6	12	12	6	12	13	6	11	13	1	4	8	6	6	4	4	6	10	10	11	12	11	11	0	1	4	0	0	0	4	4	14	13	12	10
False positives (normal)	0	0	0	0	0	0	0	0	0	0	0	0	0	0	0	0	0	0	0	0	0	0	0	0	0	0	0	0	0	0	0	0	0	0	0

## Sheet: CCCV charge and CC discharge fe
Cell index	t_cccv_charge_total, total CCCV charge duration (s)	Q_cccv_charge_total, total charged capacity during CCCV charge (Ah)	E_cccv_charge_total, total charged energy during CCCV charge (Wh)	t_cc_charge, CC charge duration (s)	Q_cc_charge, charged capacity during CC charge (Ah)	E_cc_charge, charged energy during CC charge (Wh)	cc_dVdt_mean, mean dV/dt during CC charge (mV/s)	cc_dVdt_std, standard deviation of dV/dt during CC charge, scaled by 1000	t_cv_charge, CV charge duration (s)	Q_cv_charge, charged capacity during CV charge (Ah)	E_cv_charge, charged energy during CV charge (Wh)	cv_capacity_ratio, capacity contribution of the CV stage (%)	cv_current_decay_slope, current decay slope during CV charge (mA/s)	cc2cv_slope_before, voltage slope before the CC-to-CV transition (mV/s)	cc2cv_slope_after, voltage slope after the CC-to-CV transition (mV/s)	cc2cv_slope_change, change in voltage slope at the CC-to-CV transition (mV/s)	cc2cv_index_in_charge, index of the CC-to-CV transition point in the charge profile	rest2_drop_10s, voltage drop after 10 s in the second rest period (mV)	rest2_drop_600s, voltage drop after 600 s in the second rest period (mV)	rest2_relax_rate, voltage relaxation rate during the second rest period (mV/s)	rest2_exp1_c, parameter c of the exponential fit to the second-rest voltage relaxation curve	rest2_exp1_a, parameter a of the exponential fit to the second-rest voltage relaxation curve	rest2_exp1_tau_s, time constant of the exponential fit to the second-rest voltage relaxation curve (s)	t_cc_discharge, CC discharge duration (s)	E_cc_discharge, discharge energy during CC discharge (Wh)	V_discharge_avg_voltage, average discharge voltage (V)	V_discharge_median_voltage, median discharge voltage (V)	discharge_drop_rate_mean, mean voltage drop rate during discharge (mV/s)	discharge_slope_0_3_VpAh, voltage-capacity slope over the first 3% of discharge capacity (V/Ah)	discharge_slope_0_10_VpAh, voltage-capacity slope over the first 10% of discharge capacity (V/Ah)	discharge_slope_40_60_VpAh, voltage-capacity slope over 40%-60% of discharge capacity (V/Ah)	discharge_slope_90_100_VpAh, voltage-capacity slope over 90%-100% of discharge capacity (V/Ah)	V_discharge_start_drop, instantaneous voltage drop at discharge initiation (mV)	rest3_rise_10s_V, voltage recovery after 10 s in the third rest period (V)	rest3_rise_600s_V, voltage recovery after 600 s in the third rest period (V)	rest3_relax_rate, voltage recovery rate during the third rest period (mV/s)	rest3_exp1_c, parameter c of the exponential fit to the third-rest voltage recovery curve	rest3_exp1_a, parameter a of the exponential fit to the third-rest voltage recovery curve	rest3_exp1_tau_s, time constant of the exponential fit to the third-rest voltage recovery curve (s)
F001	4195	0.722386	2.96952	3776	0.692375	2.84201	0.0974576	0.171039	418	0.0300111	0.127511	4.15444	-1.09547	0.204	0.0193333	-0.184667	3778	9.6	22	0.366667	4.22393	0.0210963	26.9521	10748	6.91188	3.50528	3.55	0.159825	-1.77411	-0.656112	-0.772166	-1.90277	7.7	0.1479	0.2158	3.59667	2.72826	-0.152744	11.4424
F002	4192	0.722291	2.96971	3778	0.692442	2.84289	0.0971678	0.170159	413	0.0298492	0.126814	4.13257	-1.1027	0.204667	0.0113333	-0.193333	3780	9.6	21.7	0.361667	4.22374	0.0209801	26.9911	10768	6.92496	3.5056	3.5503	0.159463	-1.75398	-0.648468	-0.77137	-1.90067	8.4	0.1519	0.2201	3.66833	2.72651	-0.153981	11.2622
F003	4195	0.722359	2.97068	3772	0.691336	2.83889	0.0972163	0.175147	422	0.031023	0.131791	4.29468	-1.09048	0.2	0.0166667	-0.183333	3774	9.6	22	0.366667	4.22309	0.0210819	26.7296	10711	6.88351	3.50508	3.55015	0.160256	-1.79161	-0.657504	-0.773344	-1.90258	8.1	0.1544	0.2229	3.715	2.73331	-0.156391	11.0594
F004	4194	0.721627	2.9666	3766	0.690706	2.83523	0.0975571	0.170911	427	0.0309207	0.131369	4.28486	-1.06543	0.208667	0.0153333	-0.193333	3768	9.6	22	0.366667	4.22352	0.0212364	25.0783	10713	6.88727	3.50527	3.54985	0.160254	-1.7587	-0.656222	-0.775614	-1.90358	8.1	0.1528	0.2213	3.68833	2.73076	-0.154802	11.2612
F005	4182	0.720681	2.9643	3762	0.689961	2.83376	0.0976608	0.171205	419	0.0307191	0.130538	4.26252	-1.10505	0.196667	0.008	-0.188667	3764	9.3	21.4	0.356667	4.22516	0.0205269	26.259	10755	6.90891	3.50497	3.5497	0.159721	-1.79082	-0.663199	-0.772121	-1.89351	9	0.1559	0.2244	3.74	2.7313	-0.156273	11.0819
F006	4210	0.722644	2.97224	3769	0.690795	2.83691	0.0974794	0.170492	440	0.0318493	0.135331	4.40733	-1.04624	0.188667	0.014	-0.174667	3771	9.3	21.3	0.355	4.22522	0.0202627	25.9267	10697	6.87375	3.5047	3.54955	0.160559	-1.79772	-0.664574	-0.774605	-1.90371	9	0.1516	0.2201	3.66833	2.73317	-0.155282	11.2809
F007	4217	0.726414	2.98628	3794	0.695957	2.85687	0.0973379	0.171348	422	0.030457	0.129406	4.19279	-1.09233	0.202667	0.01	-0.192667	3796	9.3	21.3	0.355	4.22476	0.0204935	26.8819	10746	6.91293	3.50673	3.5515	0.159911	-1.79762	-0.65975	-0.767597	-1.90005	8.1	0.1522	0.2201	3.66833	2.73107	-0.154305	11.1472
F008	4273	0.736419	3.02494	3850	0.705902	2.89526	0.0972727	0.176203	422	0.030517	0.129678	4.14397	-1.08411	0.200667	0.01	-0.190667	3852	9.3	20.7	0.345	4.22584	0.0198059	25.005	10750	6.91237	3.50762	3.5522	0.159935	-1.75322	-0.670813	-0.76812	-1.89278	7.8	0.1547	0.2226	3.71	2.73332	-0.155451	11.0723
F009	4250	0.731649	3.00681	3824	0.70083	2.87587	0.0971496	0.171771	425	0.0308195	0.130937	4.21233	-1.08404	0.193333	0.0113333	-0.182	3826	9	20.7	0.345	4.22494	0.0198688	26.9461	10757	6.91621	3.50678	3.5512	0.159747	-1.79161	-0.666103	-0.76446	-1.88853	8.1	0.1566	0.2241	3.735	2.73409	-0.155969	10.832
F010	4269	0.73524	3.02089	3848	0.704969	2.89226	0.0968555	0.174983	420	0.0302714	0.128628	4.11721	-1.0883	0.198667	0.012	-0.186667	3850	9.3	21.3	0.355	4.22481	0.0208069	26.5552	10748	6.90274	3.50678	3.5515	0.159797	-1.78945	-0.654839	-0.768384	-1.90225	9	0.1522	0.2204	3.67333	2.73134	-0.154512	11.1534
F011	4261	0.733818	3.0191	3819	0.699853	2.87471	0.0972506	0.187398	441	0.0339649	0.144382	4.62852	-1.05784	0.176	0.016	-0.16	3821	9.9	21.1	0.351667	4.22745	0.019381	23.4268	10725	6.89839	3.50929	3.55355	0.160252	-1.70519	-0.681546	-0.76622	-1.88797	9.6	0.1699	0.2384	3.97333	2.74423	-0.163396	10.2485
F012	4206	0.724007	2.97922	3779	0.69276	2.84639	0.0973803	0.178566	426	0.0312469	0.132828	4.31583	-1.07783	0.182667	0.014	-0.168667	3781	9.9	22.6	0.376667	4.22534	0.0217775	27.2195	10714	6.88646	3.50686	3.5515	0.160239	-1.79442	-0.65832	-0.770881	-1.8938	10.3	0.1615	0.23	3.83333	2.73942	-0.159441	10.6873
F013	4217	0.723855	2.97788	3775	0.691986	2.84242	0.0976424	0.185189	441	0.0318696	0.135455	4.40276	-1.03725	0.198667	0.012	-0.186667	3777	9.6	22.3	0.371667	4.22523	0.0213632	26.0261	10706	6.88225	3.50662	3.5512	0.160387	-1.78057	-0.663623	-0.771818	-1.89407	9.7	0.159	0.2275	3.79167	2.73931	-0.158125	10.8146
F014	4223	0.724969	2.98269	3783	0.693478	2.84885	0.0973566	0.181926	439	0.0314906	0.133841	4.34371	-1.03962	0.198667	0.014	-0.184667	3785	9.9	22.6	0.376667	4.22475	0.0217359	26.1837	10718	6.89398	3.50742	3.5525	0.160272	-1.79347	-0.655016	-0.769747	-1.88942	8.7	0.1658	0.234	3.9	2.7401	-0.160916	10.4271
F015	4234	0.72803	2.99377	3802	0.697222	2.86283	0.0971068	0.176215	431	0.0308081	0.130943	4.23171	-1.05733	0.206667	0.012	-0.194667	3804	9.3	22.3	0.371667	4.22485	0.0217189	26.3531	10758	6.91417	3.5063	3.5509	0.159611	-1.78081	-0.655151	-0.76943	-1.88782	9.4	0.1551	0.2229	3.715	2.73459	-0.155764	10.9912
F016	4229	0.72568	2.98486	3783	0.693452	2.8479	0.0975152	0.176469	445	0.0322274	0.13696	4.441	-1.03883	0.200667	0.01	-0.190667	3785	9.3	21.4	0.356667	4.22538	0.0206753	26.5883	10718	6.89071	3.50685	3.5515	0.160384	-1.78498	-0.666439	-0.771261	-1.89575	8.1	0.1606	0.2285	3.80833	2.73595	-0.158069	10.6355
F017	4228	0.726661	2.98844	3795	0.69547	2.85588	0.0971278	0.175712	432	0.031191	0.132561	4.29237	-1.05933	0.202667	0.014	-0.188667	3797	9.6	22	0.366667	4.22466	0.0213838	26.6281	10753	6.91315	3.50669	3.55135	0.159723	-1.77052	-0.654743	-0.770841	-1.89013	9.4	0.1615	0.2297	3.82833	2.73552	-0.158419	10.6902
F018	4257	0.732508	3.01137	3824	0.701342	2.87892	0.0969665	0.177143	432	0.0311657	0.132445	4.25466	-1.06417	0.198667	0.018	-0.180667	3826	9.6	22	0.366667	4.22475	0.0211957	26.6691	10736	6.90126	3.50633	3.5512	0.160004	-1.79321	-0.66095	-0.770555	-1.89079	8.7	0.1559	0.2241	3.735	2.73641	-0.156541	10.8894
F019	4208	0.724951	2.98308	3777	0.692901	2.84689	0.097273	0.176973	430	0.0320493	0.13619	4.42089	-1.07315	0.190667	0.01	-0.180667	3779	9.9	21.7	0.361667	4.22448	0.02084	25.6125	10717	6.89093	3.50656	3.5506	0.160166	-1.81277	-0.664257	-0.767646	-1.87254	9.6	0.1671	0.2356	3.92667	2.74705	-0.162215	10.3078
F020	4219	0.7238	2.97834	3765	0.690357	2.83625	0.097344	0.171675	453	0.0334434	0.142094	4.62053	-1.03287	0.18	0.0186667	-0.161333	3767	9.3	21.1	0.351667	4.22469	0.0202788	25.4988	10696	6.87722	3.50618	3.5506	0.160537	-1.80734	-0.665981	-0.77261	-1.88137	9	0.1634	0.2316	3.86	2.74424	-0.160392	10.4973
F021	4198	0.720258	2.96441	3749	0.687638	2.82579	0.0976794	0.171665	448	0.0326199	0.138615	4.52893	-1.03008	0.194667	0.014	-0.180667	3751	9.6	22.6	0.376667	4.2234	0.0220617	26.0175	10642	6.83922	3.50548	3.55	0.161154	-1.7938	-0.659139	-0.775313	-1.89096	10.2	0.1699	0.2384	3.97333	2.74473	-0.16302	10.2295
F022	4236	0.725991	2.98729	3777	0.692716	2.84591	0.0971141	0.172207	458	0.0332754	0.14138	4.58344	-1.00916	0.192	0.0166667	-0.175333	3779	9.6	22	0.366667	4.2234	0.0214808	26.753	10696	6.87728	3.50675	3.5509	0.160368	-1.79136	-0.657932	-0.770223	-1.87937	9.9	0.1658	0.234	3.9	2.74642	-0.161571	10.3987
F023	4225	0.725686	2.98542	3783	0.693606	2.84909	0.0975945	0.170983	441	0.03208	0.136334	4.42064	-1.05074	0.192667	0.006	-0.186667	3785	9.6	21.1	0.351667	4.226	0.0200058	25.5298	10702	6.88133	3.50572	3.55	0.160512	-1.81235	-0.671866	-0.771427	-1.87832	9.6	0.1656	0.2335	3.89167	2.74085	-0.160395	10.3543
F024	4271	0.734191	3.01937	3826	0.70161	2.88092	0.0971511	0.172728	444	0.0325803	0.138449	4.43758	-1.05259	0.188667	0.006	-0.182667	3828	9.3	21	0.35	4.22548	0.0199921	25.6705	10710	6.87696	3.50311	3.5484	0.160392	-1.8178	-0.673287	-0.775618	-1.88175	9	0.1572	0.2251	3.75167	2.7362	-0.157189	10.7712
F025	4282	0.735755	3.0251	3836	0.703591	2.88842	0.0970542	0.169666	445	0.0321641	0.136685	4.37158	-1.0341	0.190667	0.008	-0.182667	3838	9.7	22.4	0.373333	4.22466	0.0211928	25.7318	10706	6.88209	3.50576	3.5506	0.160359	-1.79179	-0.661494	-0.772714	-1.88831	9	0.1587	0.226	3.76667	2.73812	-0.157225	10.6934
F026	4464	0.769386	3.15626	4021	0.737498	3.02075	0.0959214	0.168276	442	0.0318887	0.135508	4.14469	-1.03729	0.202667	0.012	-0.190667	4023	10	22.7	0.378333	4.22372	0.0219707	26.2172	10691	6.87519	3.50512	3.5497	0.160499	-1.78333	-0.658089	-0.775798	-1.89665	9.6	0.1563	0.2229	3.715	2.73438	-0.155396	10.7711
F027	4365	0.750403	3.08439	3902	0.715978	2.9381	0.0966171	0.178112	462	0.0344248	0.146284	4.58751	-1.01292	0.184667	0.014	-0.170667	3904	9.9	22.9	0.381667	4.22279	0.0223616	26.6301	10646	6.84703	3.50383	3.5481	0.160943	-1.80903	-0.664887	-0.774341	-1.87124	11.2	0.1708	0.2384	3.97333	2.74964	-0.163515	9.96257
F028	4371	0.74882	3.07807	3894	0.714078	2.93045	0.0960195	0.177163	476	0.0347416	0.14762	4.63951	-0.97426	0.182667	0.01	-0.172667	3896	9.6	22.3	0.371667	4.22419	0.0210649	26.126	10687	6.86768	3.50476	3.54955	0.160625	-1.83514	-0.670389	-0.770066	-1.87676	9.3	0.1671	0.234	3.9	2.74571	-0.161344	10.1453
F029	4287	0.735566	3.02529	3827	0.702096	2.88306	0.0976222	0.174953	459	0.03347	0.142229	4.55024	-1.01655	0.188667	0.01	-0.178667	3829	9.7	21.7	0.361667	4.22482	0.020803	26.8644	10673	6.86667	3.50577	3.5503	0.160883	-1.84318	-0.673422	-0.770185	-1.87694	9.4	0.1678	0.2344	3.90667	2.74512	-0.161427	10.0044
F030	4386	0.752438	3.09288	3912	0.717823	2.94579	0.0966002	0.173349	473	0.0346143	0.147089	4.60029	-0.987783	0.186667	0.01	-0.176667	3914	9.9	22	0.366667	4.22403	0.0212692	26.7606	10675	6.86146	3.5039	3.54825	0.160712	-1.82153	-0.666767	-0.771876	-1.87289	10.2	0.1671	0.2343	3.905	2.74597	-0.161352	10.1685
G001	4817	0.831086	3.39997	4353	0.797983	3.25926	0.0965771	0.171538	463	0.0331028	0.140707	3.98308	-0.984439	0.202667	0.01	-0.192667	4355	10.3	24.5	0.408333	4.22184	0.0245165	28.3886	10644	6.8332	3.50365	3.5472	0.161067	-1.79033	-0.662237	-0.782008	-1.88565	9.9	0.1671	0.2328	3.88	2.74096	-0.159438	9.93462
G002	4856	0.839093	3.43111	4398	0.806096	3.29086	0.0977717	0.173447	457	0.0329976	0.140248	3.93253	-1.01122	0.190667	0.016	-0.174667	4400	9.6	23.3	0.388333	4.22268	0.0233778	29.2828	10655	6.84566	3.50489	3.5487	0.160985	-1.82373	-0.664769	-0.776924	-1.88776	9.9	0.1689	0.2353	3.92167	2.74368	-0.16093	9.87816
G003	5285	0.915852	3.72899	4816	0.882333	3.58651	0.101703	0.180254	468	0.0335183	0.14248	3.6598	-0.975448	0.200667	0.006	-0.194667	4818	10.5	25.1	0.418333	4.22199	0.0246951	29.497	10635	6.82627	3.50318	3.5472	0.161232	-1.80478	-0.666526	-0.784184	-1.91094	9.6	0.1677	0.2325	3.875	2.74103	-0.160304	9.60608
G004	5875	1.0224	4.12971	5390	0.987982	3.9834	0.111577	0.190709	484	0.0344193	0.146304	3.36651	-0.941899	0.196667	0.012	-0.184667	5392	10.6	26.4	0.44	4.21933	0.0272996	31.7668	10559	6.78189	3.50282	3.546	0.162184	-1.78566	-0.661143	-0.795822	-1.90681	10.2	0.1656	0.2288	3.81333	2.73634	-0.15786	9.55756
G005	4556	0.79457	3.24949	4189	0.767894	3.13616	0.0944139	0.163744	366	0.0266754	0.113331	3.35722	-1.22979	0.212	0.026	-0.186	4191	9.6	22	0.366667	4.22323	0.0214946	26.6134	10776	6.92624	3.50617	3.55	0.159345	-1.73778	-0.645042	-0.774175	-1.91692	7.8	0.1414	0.2084	3.47333	2.71426	-0.147354	11.7584
H001	4403	0.765264	3.13363	4031	0.738986	3.022	0.0955098	0.166282	371	0.0262784	0.111626	3.43391	-1.20346	0.214667	0.012	-0.202667	4033	9	21.1	0.351667	4.22404	0.02049	26.4486	10821	6.95829	3.50718	3.5518	0.158886	-1.74502	-0.64036	-0.770235	-1.91553	6.2	0.1342	0.2015	3.35833	2.71218	-0.144961	12.2721
H002	4395	0.763036	3.12496	4017	0.736208	3.01098	0.0958427	0.166027	377	0.0268285	0.113973	3.51602	-1.19209	0.213333	0.0186667	-0.194667	4019	9.3	21.1	0.351667	4.22402	0.0206125	26.7046	10786	6.93862	3.50756	3.5518	0.159318	-1.74152	-0.643805	-0.771721	-1.92173	7.4	0.138	0.2049	3.415	2.71379	-0.146182	12.0609
H003	4513	0.782884	3.20235	4122	0.755625	3.08656	0.093474	0.162122	390	0.0272586	0.115789	3.48182	-1.13364	0.222667	0.01	-0.212667	4124	9.6	22	0.366667	4.22271	0.0214398	25.6754	10758	6.90846	3.50314	3.5475	0.1595	-1.73658	-0.637744	-0.774266	-1.91519	8.4	0.1379	0.2108	3.51333	2.72194	-0.151932	13.0084
H004	4296	0.745553	3.0567	3922	0.719205	2.94478	0.0955635	0.170349	373	0.0263474	0.111919	3.53394	-1.20168	0.212667	0.01	-0.202667	3924	8.7	20.5	0.341667	4.22423	0.0204368	27.7956	10807	6.95401	3.50745	3.5518	0.159064	-1.75793	-0.646762	-0.768724	-1.91385	7.1	0.137	0.2046	3.41	2.71507	-0.146465	12.1945
H005	4231	0.733558	3.00942	3851	0.706745	2.89551	0.0970657	0.166177	379	0.0268136	0.11391	3.65528	-1.18085	0.219333	0.0166667	-0.202667	3853	9.6	21.4	0.356667	4.22374	0.0208899	26.0784	10770	6.92902	3.50656	3.5509	0.159499	-1.72821	-0.645312	-0.774819	-1.923	7.7	0.1398	0.2077	3.46167	2.71491	-0.14751	12.1322
I001	4183	0.723685	2.97198	3800	0.696711	2.85737	0.0973421	0.166647	382	0.0269742	0.114608	3.72733	-1.17237	0.219333	0.0126667	-0.206667	3802	9.6	21.7	0.361667	4.22431	0.0210352	27.1782	10798	6.94863	3.50729	3.5522	0.159168	-1.76123	-0.64663	-0.767993	-1.91276	7.4	0.1392	0.2071	3.45167	2.71853	-0.148199	12.155
I002	4172	0.722035	2.96455	3799	0.695662	2.85252	0.0969466	0.169831	372	0.0263723	0.112035	3.6525	-1.19658	0.218	0.018	-0.2	3801	9.3	21.4	0.356667	4.22344	0.0210153	26.3478	10837	6.95887	3.50639	3.55045	0.158513	-1.71835	-0.639181	-0.771418	-1.91406	7.4	0.1385	0.2061	3.435	2.71354	-0.146819	12.1854
I003	4173	0.722499	2.96849	3791	0.694986	2.85158	0.097072	0.166524	381	0.0275128	0.116905	3.808	-1.19067	0.210667	0.018	-0.192667	3793	9.3	21.7	0.361667	4.22443	0.0210242	27.2472	10789	6.93713	3.50725	3.55165	0.159246	-1.75921	-0.645476	-0.769145	-1.91278	8	0.142	0.2105	3.50833	2.72079	-0.149769	11.9436
I004	4191	0.725172	2.97867	3807	0.697863	2.86264	0.0968479	0.16962	383	0.0273096	0.116033	3.76594	-1.17481	0.215333	0.0166667	-0.198667	3809	9.6	22	0.366667	4.22419	0.0210418	26.7887	10809	6.94988	3.50737	3.5522	0.159006	-1.74878	-0.640969	-0.768205	-1.91044	7.1	0.1398	0.2077	3.46167	2.7186	-0.148314	12.0258
I005	4231	0.730122	2.99995	3821	0.700486	2.87403	0.0963884	0.169794	409	0.0296356	0.125921	4.059	-1.12878	0.208667	0.014	-0.194667	3823	9	21.4	0.356667	4.22428	0.0207827	27.2036	10817	6.94927	3.50421	3.54825	0.158547	-1.73276	-0.642806	-0.770581	-1.90248	10.8	0.1426	0.2102	3.50333	2.71913	-0.14849	11.9084
J001	4268	0.739514	3.03436	3884	0.712139	2.91806	0.0958805	0.167263	383	0.0273746	0.116302	3.7017	-1.18115	0.202667	0.0153333	-0.187333	3886	9.3	21	0.35	4.2248	0.0204933	25.9489	10802	6.94519	3.50718	3.5515	0.159146	-1.73692	-0.646995	-0.772717	-1.9151	7.8	0.1426	0.2099	3.49833	2.71547	-0.148179	11.7878
J002	4198	0.725138	2.97908	3802	0.69709	2.85991	0.0968964	0.167061	395	0.0280487	0.119165	3.86805	-1.14526	0.208667	0.0113333	-0.197333	3804	9	21.1	0.351667	4.22433	0.0206333	27.4082	10778	6.9332	3.50825	3.5528	0.159408	-1.74619	-0.642078	-0.770696	-1.92161	8	0.1432	0.2108	3.51333	2.71968	-0.149445	11.8436
J003	4205	0.727441	2.98773	3814	0.699717	2.86992	0.0969061	0.166168	390	0.0277242	0.117803	3.8112	-1.15871	0.214667	0.014	-0.200667	3816	8.9	21.3	0.355	4.22472	0.0207751	27.1004	10785	6.93951	3.50817	3.5528	0.15936	-1.73438	-0.64298	-0.772311	-1.92252	7.8	0.1405	0.2084	3.47333	2.71791	-0.148281	12.0149
J004	4185	0.723326	2.97137	3792	0.695322	2.8524	0.0970464	0.168994	392	0.0280031	0.118971	3.87144	-1.15541	0.213333	0.018	-0.195333	3794	9.3	21.4	0.356667	4.22384	0.0210263	27.1678	10753	6.92001	3.50752	3.552	0.159751	-1.73946	-0.640184	-0.773729	-1.92428	8	0.1402	0.2081	3.46833	2.71751	-0.148074	11.97
J005	4212	0.727631	2.98871	3819	0.699945	2.87108	0.0966222	0.168861	392	0.0276861	0.117633	3.80497	-1.14484	0.210667	0.0126667	-0.198	3821	9	21.4	0.356667	4.2244	0.0208785	27.2925	10844	6.97099	3.50766	3.5525	0.158493	-1.74541	-0.641448	-0.767252	-1.90666	7.4	0.1445	0.2124	3.54	2.7181	-0.149604	11.7611
K001	4161	0.718973	2.9537	3768	0.690565	2.83298	0.0984873	0.176959	392	0.0284082	0.120718	3.95122	-1.16608	0.206667	0.014	-0.192667	3770	9.7	21.4	0.356667	4.22524	0.0204582	25.995	10545	6.7795	3.50746	3.5518	0.162987	-1.79406	-0.671133	-0.785145	-1.95015	8.1	0.1497	0.2189	3.64833	2.72664	-0.153481	11.5788
K002	4149	0.715774	2.94146	3745	0.686609	2.81756	0.0986649	0.176136	403	0.0291646	0.123907	4.07456	-1.13579	0.204	0.018	-0.186	3747	9.3	21.1	0.351667	4.224	0.0206988	26.6243	10573	6.80077	3.50785	3.5522	0.162442	-1.79399	-0.660317	-0.780504	-1.94123	8.3	0.1529	0.2217	3.695	2.73017	-0.155276	11.4144
K003	4155	0.716659	2.94408	3752	0.687978	2.82223	0.0987473	0.16852	402	0.0286805	0.12185	4.00197	-1.13173	0.208667	0.0133333	-0.195333	3754	9.6	21.7	0.361667	4.22404	0.0209457	27.1465	10577	6.80414	3.50786	3.5525	0.162409	-1.78469	-0.662808	-0.782547	-1.94733	8	0.1494	0.2189	3.64833	2.72664	-0.153366	11.606
K004	4148	0.715304	2.93924	3746	0.686696	2.81769	0.0986652	0.1764	401	0.0286076	0.121548	3.99937	-1.12474	0.208667	0.0146667	-0.194	3748	9.3	21.7	0.361667	4.22379	0.021197	26.3749	10568	6.79491	3.50831	3.5531	0.162576	-1.78144	-0.657375	-0.783427	-1.95019	7.4	0.1488	0.2176	3.62667	2.72871	-0.1536	11.6802
K005	4153	0.716526	2.94432	3751	0.687847	2.82246	0.0986937	0.174573	401	0.0286785	0.121857	4.00244	-1.13608	0.208667	0.014	-0.194667	3753	9.3	21.3	0.355	4.22486	0.0206393	26.6032	10590	6.81417	3.50821	3.5528	0.162238	-1.78923	-0.661928	-0.780551	-1.94462	8.4	0.1501	0.2192	3.65333	2.72827	-0.153925	11.5687
True positives (defective)	13	11	11	9	9	11	14	11	22	21	21	25	22	17	1	12	9	6	5	5	5	4	8	21	22	1	4	20	0	16	9	22	8	16	16	16	16	16	24
False positives (normal)	0	0	0	0	0	0	0	0	0	0	0	0	0	0	0	0	0	0	0	0	0	0	0	0	0	0	0	0	0	0	0	0	0	0	0	0	0	0	0

## Sheet: incremental-capacity and resist
电池序号	ic_bin_dV, voltage-bin width used for IC calculation; fixed setting and not used as a candidate feature (V)	ic_peak_voltage, IC peak voltage (V)	ic_peak_height, IC peak height (Ah/V)	ic_left_slope_Ah_per_V2, pre-peak slope of the IC curve (Ah/V²)	ic_right_slope_Ah_per_V2, post-peak slope of the IC curve (Ah/V²)	ic_slope_change_Ah_per_V2, change in IC-curve slope across the peak (Ah/V²)	ic_area_total_Ah, total area under the IC peak (Ah)	ic_area_left_Ah, left-side area of the IC peak (Ah)	ic_area_right_Ah, right-side area of the IC peak (Ah)	ic_area_pm10mV_Ah, capacity within ±10 mV around the IC peak (Ah)	ic_area_pm20mV_Ah, capacity within ±20 mV around the IC peak (Ah)	ic_fwhm_V, full width at half maximum of the IC peak; a smaller value generally indicates a sharper peak (V)	ic_area_halfmax_Ah, area within the half-maximum region of the IC peak (Ah)	Note: the following columns are apparent DC internal resistance values from rest to CC charge at the first sample, 1 s, 2 s, 5 s, and 10 s	R_firstSample_mOhm, apparent DC internal resistance at the first sample (mΩ)	R_1s_mOhm, apparent DC internal resistance at 1 s (mΩ)	R_2s_mOhm, apparent DC internal resistance at 2 s (mΩ)	R_5s_mOhm, apparent DC internal resistance at 5 s (mΩ)	R_10s_mOhm, apparent DC internal resistance at 10 s (mΩ)	V_firstSample_V, voltage at the first sample (V)	V_1s_V, voltage at 1 s (V)	V_2s_V, voltage at 2 s (V)	V_5s_V, voltage at 5 s (V)	V_10s_V, voltage at 10 s (V)
F001	0.005	4.1575	10.8184	483.342	-363.79	-847.132	0.691977	0.451269	0.240708	0.130065	0.236629	0.015	0.138102		17.4301	20.1582	22.5833	27.713	33.3162	3.8802	3.882	3.8836	3.887	3.8907
F002	0.005	4.1625	11.0214	493.397	-360.945	-854.341	0.692136	0.483561	0.208576	0.171278	0.239062	0.015	0.145587		16.9898	20.3184	23.038	27.7365	33.3258	3.8811	3.8833	3.8851	3.8882	3.8919
F003	0.005	4.1625	10.9724	491.192	-353.609	-844.801	0.690968	0.471932	0.219036	0.170543	0.238998	0.015	0.143112		19.2544	20.6189	23.0446	28.1912	34.2538	3.8811	3.882	3.8836	3.887	3.891
F004	0.005	4.1625	10.7843	476.611	-349.939	-826.55	0.690264	0.485506	0.204757	0.168336	0.236044	0.015	0.143026		18.7836	20.1469	22.5706	27.721	33.3258	3.8808	3.8817	3.8833	3.8867	3.8904
F005	0.005	4.1625	10.7107	472.69	-355.313	-828.003	0.689519	0.465538	0.223981	0.168394	0.234756	0.015	0.138958		20.1469	21.9647	24.3884	29.5387	35.598	3.8817	3.8829	3.8845	3.8879	3.8919
F006	0.005	4.1625	10.6915	471.405	-344.084	-815.488	0.690352	0.470381	0.21997	0.167246	0.234847	0.015	0.139479		20.6129	22.8864	24.8568	30.01	36.0726	3.8814	3.8829	3.8842	3.8876	3.8916
F007	0.005	4.1625	11.0795	505.305	-359.045	-864.35	0.695711	0.481198	0.214513	0.171665	0.239231	0.015	0.145434		18.7731	20.7441	23.0184	27.713	34.3762	3.8792	3.8805	3.882	3.8851	3.8895
F008	0.005	4.1575	10.5855	468.157	-379.904	-848.06	0.705627	0.452679	0.252948	0.136688	0.235056	0.015	0.136688		17.8796	19.2433	21.6677	26.3648	32.4257	3.8746	3.8755	3.8771	3.8802	3.8842
F009	0.005	4.1575	10.642	475.284	-393.178	-868.462	0.700432	0.436583	0.26385	0.141638	0.234862	0.015	0.141638		19.2596	20.7703	23.038	28.6459	34.4054	3.8767	3.8777	3.8792	3.8829	3.8867
F010	0.005	4.1625	11.1755	508.331	-362.744	-871.075	0.704451	0.488682	0.215769	0.172304	0.240456	0.015	0.145525		19.2652	20.7791	23.0509	27.7521	34.2731	3.8761	3.8771	3.8786	3.8817	3.886
F011	0.005	4.1675	10.1646	440.304	-323.02	-763.323	0.699825	0.485675	0.21415	0.16377	0.232094	0.015	0.137595		21.5285	23.0446	25.3188	30.9283	36.5273	3.8792	3.8802	3.8817	3.8854	3.8891
F012	0.005	4.1625	10.8891	492.76	-412.345	-905.105	0.692654	0.436772	0.255882	0.144486	0.23862	0.015	0.144486		21.977	23.4927	25.7662	30.9107	37.1128	3.8826	3.8836	3.8851	3.8885	3.8926
F013	0.005	4.1625	10.9251	491.02	-366.127	-857.147	0.691406	0.460958	0.230448	0.17179	0.238392	0.015	0.140811		20.607	22.8798	25.3042	30.0057	36.5168	3.8814	3.8829	3.8845	3.8876	3.8919
F014	0.005	4.1625	11.1455	508.148	-377.628	-885.777	0.692914	0.453398	0.239516	0.175035	0.241548	0.015	0.141824		20.1582	21.5223	24.8568	29.5511	35.6077	3.8817	3.8826	3.8848	3.8879	3.8919
F015	0.005	4.1625	11.1497	502.224	-362.609	-864.833	0.69664	0.47438	0.22226	0.172869	0.240843	0.015	0.144322		21.2131	23.0282	25.4557	30.6033	36.2039	3.8805	3.8817	3.8833	3.8867	3.8904
F016	0.005	4.1625	10.8762	488.331	-358.305	-846.636	0.692887	0.465204	0.227683	0.169987	0.236344	0.015	0.140322		19.2488	21.0676	23.9474	28.6377	34.244	3.8805	3.8817	3.8836	3.8867	3.8904
F017	0.005	4.1625	10.8856	483.072	-371.65	-854.723	0.69492	0.465922	0.228998	0.171287	0.236649	0.015	0.139644		20.7761	22.1348	24.5607	29.2564	35.7695	3.8811	3.882	3.8836	3.8867	3.891
F018	0.005	4.1625	11.0165	492.749	-360.453	-853.201	0.70096	0.478688	0.222272	0.171148	0.238885	0.015	0.14275		19.6925	21.5132	23.934	29.5345	35.1334	3.8783	3.8795	3.8811	3.8848	3.8885
F019	0.005	4.1625	10.8604	488.475	-382.072	-870.546	0.692444	0.44359	0.248854	0.174556	0.239162	0.02	0.174556		22.1098	23.9238	26.3501	31.4946	37.5564	3.8817	3.8829	3.8845	3.8879	3.8919
F020	0.005	4.1625	10.7205	470.628	-397.284	-867.912	0.689944	0.438448	0.251496	0.17398	0.235559	0.015	0.140394		21.0676	22.8831	25.3042	30.4518	36.5069	3.8817	3.8829	3.8845	3.8879	3.8919
F021	0.005	4.1675	10.9196	489.364	-357.057	-846.421	0.687289	0.479765	0.207524	0.171283	0.23976	0.015	0.144932		22.8736	24.3884	26.6606	31.811	38.4761	3.8829	3.8839	3.8854	3.8888	3.8932
F022	0.005	4.1675	10.8331	481.986	-356.538	-838.524	0.692305	0.486755	0.20555	0.171941	0.240871	0.015	0.145776		21.889	23.7033	26.5772	31.2718	37.34	3.8814	3.8826	3.8845	3.8876	3.8916
F023	0.005	4.1625	10.7076	473.528	-360.83	-834.358	0.693042	0.455056	0.237986	0.169995	0.236061	0.015	0.136992		21.6677	23.9372	26.3648	31.062	37.5775	3.8805	3.882	3.8836	3.8867	3.891
F024	0.005	4.1625	10.3548	447.935	-379.962	-827.897	0.701243	0.447262	0.25398	0.170879	0.233045	0.015	0.138329		21.6617	23.934	26.3576	31.508	37.5672	3.8777	3.8792	3.8808	3.8842	3.8882
F025	0.005	4.1625	10.8706	481.778	-406.455	-888.233	0.703133	0.453761	0.249372	0.176723	0.238535	0.015	0.141996		21.4225	23.2489	25.5315	30.8177	36.8856	3.8771	3.8783	3.8798	3.8833	3.8873
F026	0.005	4.1625	11.0536	492.522	-381.007	-873.529	0.737132	0.50478	0.232352	0.174027	0.239505	0.015	0.141349		20.6014	22.5674	25.29	30.4389	36.6478	3.8634	3.8647	3.8665	3.8699	3.874
F027	0.005	4.1675	10.8259	481.967	-361.598	-843.565	0.715504	0.489582	0.225922	0.171594	0.239302	0.015	0.140431		25.4414	26.8007	29.6736	34.821	40.8769	3.8718	3.8727	3.8746	3.878	3.882
F028	0.005	4.1675	11.0516	499.523	-361.378	-860.9	0.7138	0.497261	0.216539	0.173048	0.241998	0.015	0.145144		22.5706	23.934	27.2665	31.9624	38.4761	3.8749	3.8758	3.878	3.8811	3.8854
F029	0.005	4.1675	11.0076	498.033	-356.402	-854.434	0.701536	0.486398	0.215137	0.171871	0.240852	0.015	0.144811		22.1038	23.4664	26.3429	31.4903	37.5462	3.8755	3.8764	3.8783	3.8817	3.8857
F030	0.005	4.1675	10.9606	490.045	-364.781	-854.826	0.71736	0.487843	0.229517	0.171993	0.23967	0.015	0.140463		24.5328	26.3465	28.7652	34.3669	40.4227	3.8712	3.8724	3.874	3.8777	3.8817
G001	0.005	4.1625	11.0724	490.56	-362.482	-853.042	0.797985	0.563384	0.234602	0.130126	0.245525	0.015	0.144058		24.8568	26.3724	28.6459	34.7035	41.3655	3.8299	3.8309	3.8324	3.8364	3.8408
G002	0.005	4.1625	11.1071	504.648	-417.16	-921.808	0.805299	0.541764	0.263535	0.181851	0.244534	0.015	0.147362		23.038	25.0083	27.7365	32.8897	40.0133	3.82	3.8213	3.8231	3.8265	3.8312
G003	0.005	4.1575	10.846	478.055	-340.526	-818.581	0.882185	0.618241	0.263944	0.134079	0.248555	0.02	0.175851		23.5191	26.846	29.5638	35.7798	43.6635	3.7608	3.763	3.7648	3.7689	3.7741
G004	0.005	4.1575	8.49279	297.187	-235.354	-532.541	0.988005	0.743196	0.244809	0.109612	0.218888	0.025	0.1712		22.141	26.3798	30.1616	37.5883	47.4401	3.6489	3.6517	3.6542	3.6591	3.6656
G005	0.005	4.1525	11.231	507.409	-369.314	-876.723	0.767576	0.532371	0.235205	0.126975	0.239956	0.015	0.144023		17.425	18.3368	20.6129	25.3042	31.5166	3.8523	3.8529	3.8544	3.8575	3.8616
H001	0.005	4.1525	11.2929	519.667	-380.584	-900.251	0.738665	0.498829	0.239836	0.130681	0.239301	0.015	0.142688		15.0007	16.3644	18.3342	23.0314	28.6377	3.8625	3.8634	3.8647	3.8678	3.8715
H002	0.005	4.1525	11.0697	505.833	-400.513	-906.346	0.735963	0.485307	0.250656	0.138127	0.238194	0.01	0.102327		15.9144	17.2785	19.7035	24.4021	30.01	3.8628	3.8637	3.8653	3.8684	3.8721
H003	0.005	4.1525	10.9622	497.639	-392.783	-890.422	0.755334	0.511662	0.243671	0.135103	0.235682	0.015	0.139319		16.066	16.9729	19.2433	24.5466	30.1529	3.8622	3.8628	3.8643	3.8678	3.8715
H004	0.005	4.1525	10.9293	496.83	-383.87	-880.7	0.718961	0.472517	0.246444	0.133071	0.235915	0.015	0.139244		14.9966	16.9658	19.2381	23.4795	29.5387	3.8727	3.874	3.8755	3.8783	3.8823
H005	0.005	4.1575	11.0603	499.18	-364.352	-863.532	0.70659	0.505572	0.201018	0.119136	0.236804	0.01	0.106382		15.5938	17.408	19.6758	23.9137	30.1191	3.874	3.8752	3.8767	3.8795	3.8836
I001	0.005	4.1525	11.1352	509.944	-400.671	-910.615	0.696498	0.442718	0.25378	0.138945	0.23951	0.01	0.102765		15.005	17.4275	19.6979	24.395	29.9932	3.8786	3.8802	3.8817	3.8848	3.8885
I002	0.005	4.1525	11.0237	495.881	-428.494	-924.375	0.695525	0.443708	0.251817	0.143503	0.236435	0.01	0.104835		15.0219	16.9921	18.8101	23.9677	29.5804	3.8795	3.8808	3.882	3.8854	3.8891
I003	0.005	4.1575	11.2562	516.489	-365.428	-881.917	0.694497	0.468274	0.226223	0.125914	0.239728	0.015	0.144246		17.425	19.2433	21.0616	25.7587	31.9712	3.8805	3.8817	3.8829	3.886	3.8901
I004	0.005	4.1575	11.573	536.487	-378.841	-915.328	0.697678	0.478455	0.219224	0.126087	0.243039	0.015	0.149001		16.3691	17.8847	20.6129	24.8568	30.4647	3.8795	3.8805	3.8823	3.8851	3.8888
I005	0.005	4.1575	11.024	492.778	-437.536	-930.314	0.699966	0.444396	0.255571	0.147241	0.23707	0.01	0.106451		22.1286	23.4927	25.3115	30.4603	35.7592	3.8805	3.8814	3.8826	3.886	3.8895
J001	0.005	4.1575	11.1845	505.562	-371.593	-877.155	0.71168	0.501284	0.210396	0.122204	0.238418	0.015	0.146987		16.3738	17.7332	20.1524	24.8496	30.4559	3.8758	3.8767	3.8783	3.8814	3.8851
J002	0.005	4.1575	11.1842	508.974	-368.652	-877.626	0.696891	0.466819	0.230071	0.127152	0.237955	0.015	0.142339		16.8238	18.3368	20.607	25.7587	31.5166	3.8798	3.8808	3.8823	3.8857	3.8895
J003	0.005	4.1575	11.2156	508.797	-371.569	-880.366	0.699489	0.476325	0.223164	0.125976	0.23804	0.015	0.143405		16.8095	18.3239	20.5954	24.8357	30.8932	3.8792	3.8802	3.8817	3.8845	3.8885
J004	0.005	4.1575	11.2831	515.868	-372.354	-888.222	0.695138	0.470836	0.224302	0.126339	0.238681	0.015	0.144064		16.5917	18.1069	20.3797	25.0735	31.2893	3.8798	3.8808	3.8823	3.8854	3.8895
J005	0.005	4.1575	11.4366	523.935	-373.646	-897.581	0.699746	0.482804	0.216942	0.124538	0.242296	0.015	0.148548		15.9144	17.4301	20.1582	24.8568	30.01	3.8795	3.8805	3.8823	3.8854	3.8888
K001	0.005	4.1575	10.5809	472.106	-336.486	-808.592	0.69023	0.462668	0.227562	0.121967	0.234159	0.015	0.138553		17.6625	19.9338	22.3559	27.0545	33.1171	3.878	3.8795	3.8811	3.8842	3.8882
K002	0.005	4.1625	10.6093	475.951	-342.479	-818.431	0.686349	0.480932	0.205417	0.167542	0.235225	0.015	0.14273		17.8796	20.1524	23.0314	27.7285	33.7894	3.8783	3.8798	3.8817	3.8848	3.8888
K003	0.005	4.1575	10.6961	479.187	-358.902	-838.089	0.687701	0.453379	0.234322	0.127529	0.232534	0.015	0.135841		17.425	19.6979	21.6677	26.8121	32.4169	3.8777	3.8792	3.8805	3.8839	3.8876
K004	0.005	4.1575	10.7422	484.192	-413.555	-897.747	0.686478	0.431337	0.255142	0.144115	0.234397	0.015	0.144115		17.4351	19.4032	21.6739	26.3724	32.4351	3.8789	3.8802	3.8817	3.8848	3.8888
K005	0.005	4.1575	10.7092	483.871	-391.938	-875.809	0.687588	0.438057	0.24953	0.1379	0.233898	0.01	0.100796		16.9705	19.8467	22.1162	26.8121	32.8713	3.8783	3.8802	3.8817	3.8848	3.8888
True positives (defective)	-	7	10	9	5	7	9	8	2	13	6	8	8	-	14	16	16	17	19	8	8	8	8	8
False positives (normal)	-	0	0	0	0	0	0	0	0	0	0	0	0	-	0	0	0	0	0	0	0	0	0	0
